# Supplementary material for: Supplementing Boar Diet with Nicotinamide Mononucleotide Improves Sperm Quality Probably through the Activation of the SIRT3 Signaling Pathway
Source: MDPI journal article supplement (doi:10.3390/antiox13050507), 2024-04-24
Supplement: s1 [file s1]

## Supplementary File

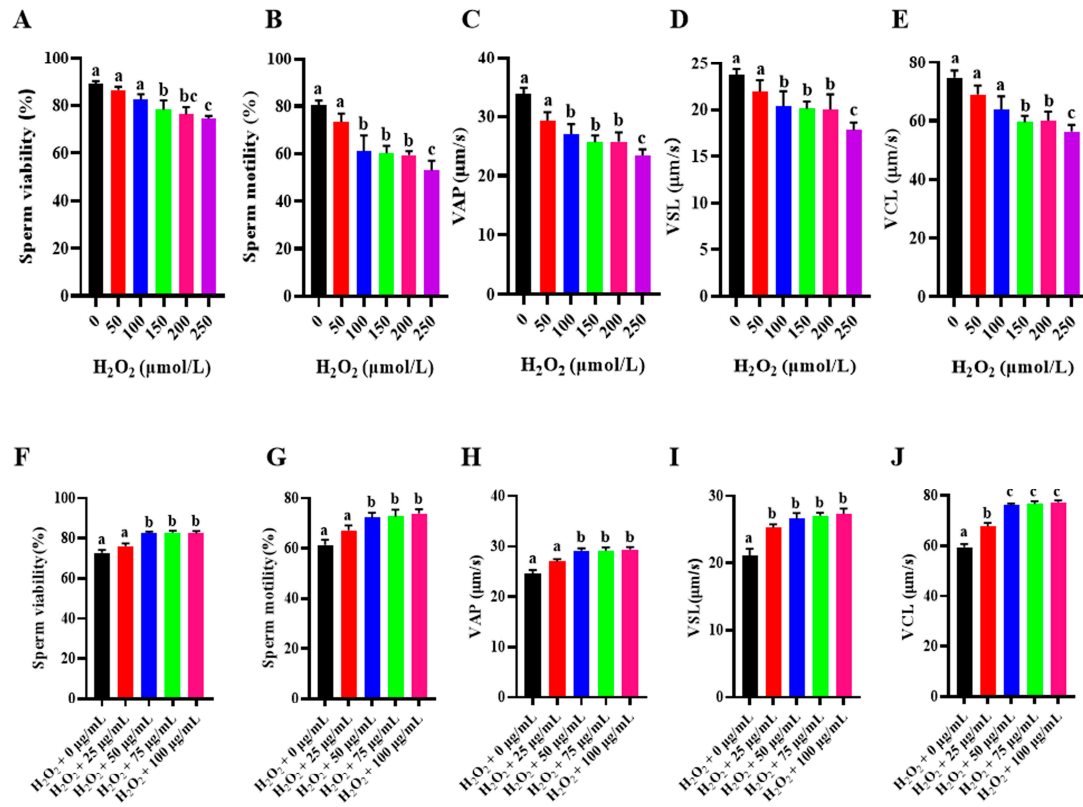

**Figure. S1.** Screening for suitable concentrations of H<sub>2</sub>O<sub>2</sub> and NMN. (A) Sperm viability after treatment with H<sub>2</sub>O<sub>2</sub> for 4 h. (B) Sperm motility. (C) VAP. (D) VSL. (E) VCL. (F) Sperm viability after treatment with NMN for 4 h. (G) Sperm motility. (H) VAP. (I) VSL. (J) VCL. The data are represented as mean ± SEM (n = 5), and different letter indicates significant difference (*P* < 0.05).

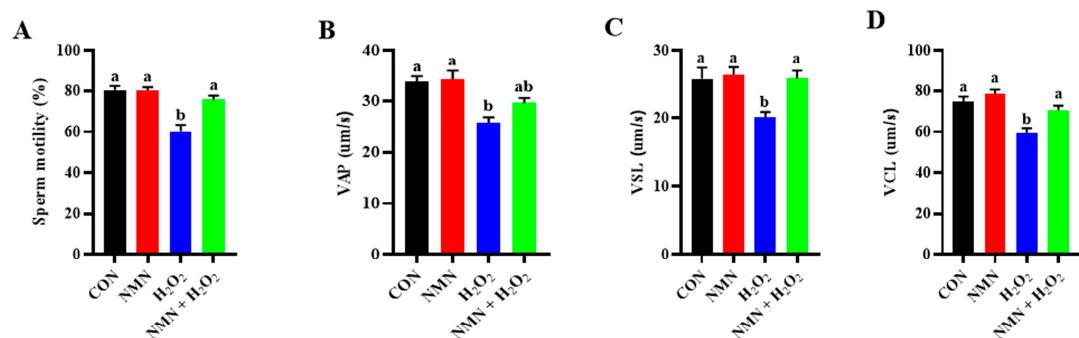

**Figure. S2.** NMN rescues sperm quality after H<sub>2</sub>O<sub>2</sub> treatment. (A) Sperm motility after co-treatment with NMN and H<sub>2</sub>O<sub>2</sub>. (B) VAP. (C) VSL. (D) VCL. The data are represented as

mean  $\pm$  SEM (n = 5), and different letter indicates significant difference ( $P < 0.05$ ).

**Table S1**

Composition and nutrient analysis of basal diet.

| Ingredient                           | Content, % |
|--------------------------------------|------------|
| Corn                                 | 37.48      |
| Barley                               | 15.22      |
| wheat                                | 14.81      |
| Rice bran meal                       | 10.17      |
| Soybean meal                         | 14.80      |
| Soybean oil                          | 2.50       |
| L-lysine                             | 0.40       |
| Methionine                           | 0.15       |
| Threonine                            | 0.25       |
| Ground limestone                     | 1.52       |
| Monocalcium phosphate                | 1.21       |
| Sodium chloride                      | 0.49       |
| Premix*                              | 1.00       |
| total                                | 100        |
| Nutrient, %                          |            |
| Calculated NE, kcal kg <sup>-1</sup> | 2.30       |
| Crude protein, %                     | 16.20      |
| Crude fat, %                         | 3.86       |
| Crude ash, %                         | 6.74       |
| Crude fiber, %                       | 4.45       |
| Ca, %                                | 0.85       |
| P, %                                 | 0.57       |

\* Premix provided the following minerals per kilogram: VA 5800 IU, VD 3500 IU, VE 30 IU, VK 28.5 mg, VB 65.0 mg, VB1200  $\mu$ g, biotin 0.25 mg, D-pantothenic acid 5.6 mg, nicotinic acid 10 mg, Cu 20 mg, Fe 180 mg, Zn 150 mg, Mn 60 mg, I 0.60 mg,

Se 0.60 mg, and Cr 0.25 mg.
